# Supplementary material for: Efficient degradation of VOCs using semi-coke activated carbon loaded ternary Z-scheme heterojunction photocatalyst BiVO4–BiPO4–g-C3N4 under visible light irradiation
Source: Royal Society of Chemistry journal article supplement (doi:10.1039/d2cp03606a), 2022-01-01
Supplement: d2cp03606a1.pdf [file d2cp03606a1.pdf]

Supplementary Information:

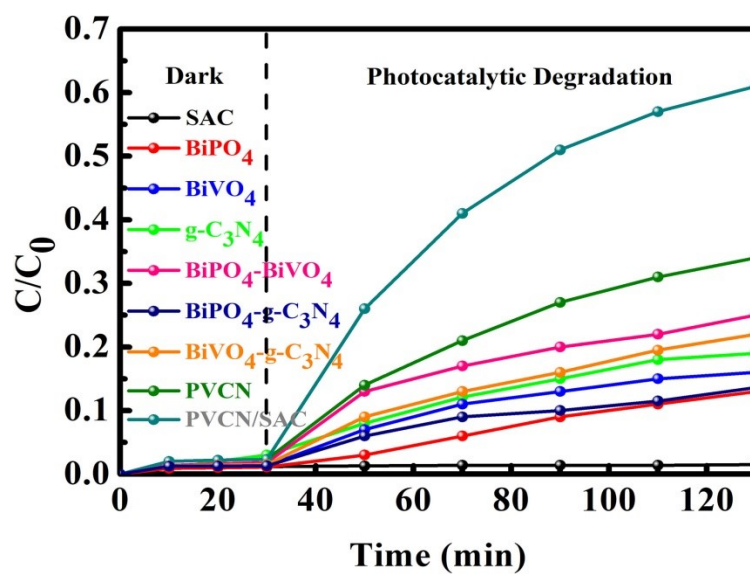

Figure S1. The amount of CO<sub>2</sub> produced by PVCN/SAC under light conditions
